# Supplementary material for: Indigo Pulverata Levis (Chung-Dae, Persicaria tinctoria) Alleviates Atopic Dermatitis-like Inflammatory Responses In Vivo and In Vitro
Source: MDPI journal article supplement (doi:10.3390/ijms23010553), 2022-01-05
Supplement: s1 [file s1]

## Method

### S1. Cell Viability Assay

HaCaT cells were seeded in a 96 well plate, with  $8 \times 10^3$  cells/well. After 24 h, CHD (50, 100 and 200  $\mu\text{g/mL}$ ) was added to the medium for 24 h. Then, 20  $\mu\text{L}$  of the EZ-Cytox solution were added to each well. After incubation for 2 h at 37 °C, the optical density was measured using an ELISA (Infinite M200, Tecan, Männedorf, Switzerland) at an optical density of 450 nm.

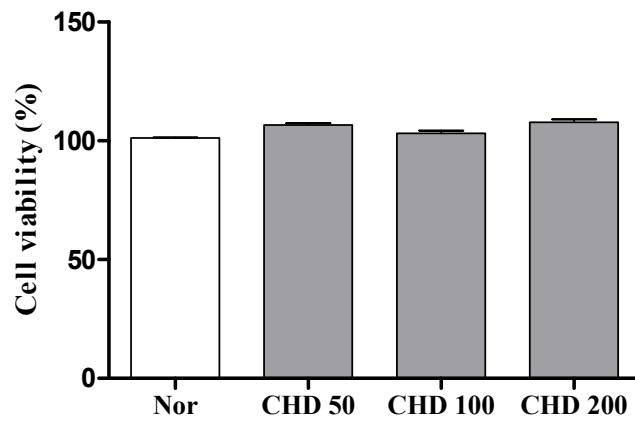

**Figure S1.** Effects of CHD on cytotoxicity of TNF- $\alpha$ /IFN- $\gamma$ -stimulated HaCaT cells. The cytotoxicity of CHD was measured using a Spectrophotometer.
